# Supplementary material
Source: publisher figshare collection journal article supplement (https://tandf.figshare.com/articles/dataset/_/5631745)
Supplement: Supplementary file 1 [file 2]

## Supplementary Information

### Habitat variables associated with encounters of Hottentot Buttonquail *Turnix hottentottus* during flush surveys across the Fynbos biome

Alan TK Lee, Dale R Wright and Brian Reeves

Ostrich 2018, 89(1): 13–18. DOI: 10.2989/00306525.2017.1343209

**Table S1:** A summary of the covariates (untransformed) from the habitat plots associated with the survey for Hottentot Buttonquail across the fynbos biome.

| Covariate               | Median | Minimum  | Maximum |
|-------------------------|--------|----------|---------|
| Altitude (m)            | 984    | 18       | 1866    |
| Erica cover (%)         | 10     | 0        | 50      |
| Protea cover (%)        | 5      | 0        | 80      |
| Restio cover (%)        | 30     | 0        | 90      |
| Daisy cover (%)         | 10     | 0        | 75      |
| Grass cover (%)         | 10     | 0        | 90      |
| Other veg cover (%)     | 20     | 0        | 100     |
| Total veg cover (%)     | 70     | 0        | 100     |
| Slope (degrees)         | 4      | 0 (flat) | 70      |
| Heterogeneity           | 5      | 1        | 6       |
| Time since fire (years) | 6      | 0        | 50      |
